# Supplementary material for: Natural language processing of radiology reports for the detection of thromboembolic diseases and clinically relevant incidental findings
Source: Springer Nature journal article supplement (doi:10.1186/1471-2105-15-266), 2014-08-07
Supplement: 12859_2014_6535_MOESM1_ESM.pdf [file 12859_2014_6535_MOESM1_ESM.pdf]

**[Entities]**

Disease

ThromboPat

PP

K

Anatomy

Exam

**[Attributes]**

Category Arg:ThromboPat, Value:Positive|Negative|Hypothetical

Category Arg:K, Value:Positive|Negative|Hypothetical|Known|Incidental

**[Relations]**

Location\_of Arg1:Anatomy, Arg2:ThromboPat

Location\_of Arg1:Anatomy, Arg2:K

Reveals Arg1:Exam, Arg2:ThromboPat
