# Supplementary material for: Natural language processing of radiology reports for the detection of thromboembolic diseases and clinically relevant incidental findings
Source: Springer Nature journal article supplement (doi:10.1186/1471-2105-15-266), 2014-08-07
Supplement: 12859_2014_6535_MOESM2_ESM.pdf [file 12859_2014_6535_MOESM2_ESM.pdf]

ThromboPat

Anatomy Anatomy

60 Embolie pulmonaire bilatérale , au maximum lobaire ( lingua ) avec dilatation des cavités droites ( VD/VG=1 )

ThromboPat

Anatomy

Anatomy

Anatomy

Anatomy

61 Thrombose des deux veines poplitées , deux fémorales superficielles , saphène droite , iliaque externe droite .

K

Anatomy

K

K

Anatomy

Anatomy

62 Masse tissulaire du lobe inférieur droit de 4 cm avec aspect de lymphangite carcinomateuse et adénomégalies médiastinales bilatérales .

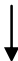

ThromboPat [Positive]

Location\_of

Anatomy

Anatomy

60 Embolie pulmonaire bilatérale , au maximum lobaire ( lingua ) avec dilatation des cavités droites ( VD/VG=1 )

ThromboPat [Positive]

Location\_of

Anatomy

Location\_of

Anatomy

Location\_of

Anatomy

Location\_of

Anatomy

Anatomy

61 Thrombose des deux veines poplitées , deux fémorales superficielles , saphène droite , iliaque externe droite .

K [Incidental]

Location\_of

Anatomy

K [Incidental]

K [Incidental]

Location\_of

Anatomy

Anatomy

62 Masse tissulaire du lobe inférieur droit de 4 cm avec aspect de lymphangite carcinomateuse et adénomégalies médiastinales bilatérales .
