# Supplementary material for: Natural language processing of radiology reports for the detection of thromboembolic diseases and clinically relevant incidental findings
Source: Springer Nature journal article supplement (doi:10.1186/1471-2105-15-266), 2014-08-07

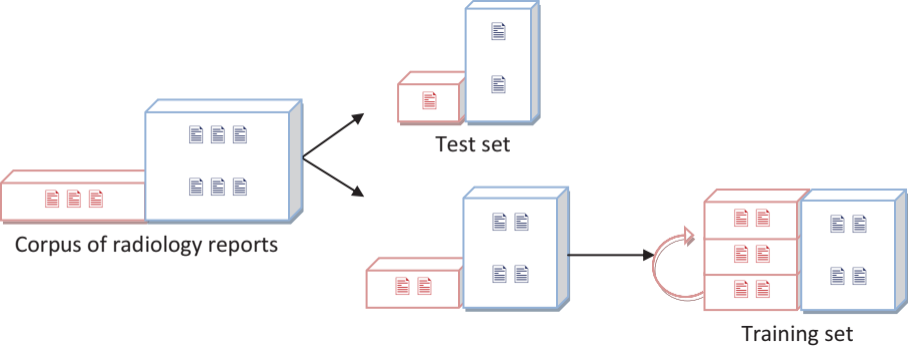

Supplement: 12859_2014_6535_MOESM3_ESM.pdf [file 12859_2014_6535_MOESM3_ESM.pdf]
